# Supplementary material for: A self-adhesive wearable strain sensor based on a highly stretchable, tough, self-healing and ultra-sensitive ionic hydrogel
Source: Royal Society of Chemistry journal article supplement (doi:10.1039/d0tc04144k), 2020-01-01
Supplement: d0tc04144k1.pdf [file d0tc04144k1.pdf]

*Supporting Information for*

**A Self-adhesive Wearable Strain Sensor Based on Highly stretchable, Tough, Self-healing and ultra-sensitive ionic hydrogel**

Jianyu Yin, Shenxin Pan, Lili Wu, Liyina Tan, Di Chen, Shan Huang, Yuhong Zhang\*, Peixin

He\*

Hubei Collaborative Innovation Center for Advanced Organic Chemical Materials, Ministry- of-

Education Key Laboratory for the Synthesis and Application of Organic Functional Molecules,

College of Chemistry and Chemical Engineering, Hubei University, Wuhan 430062, China

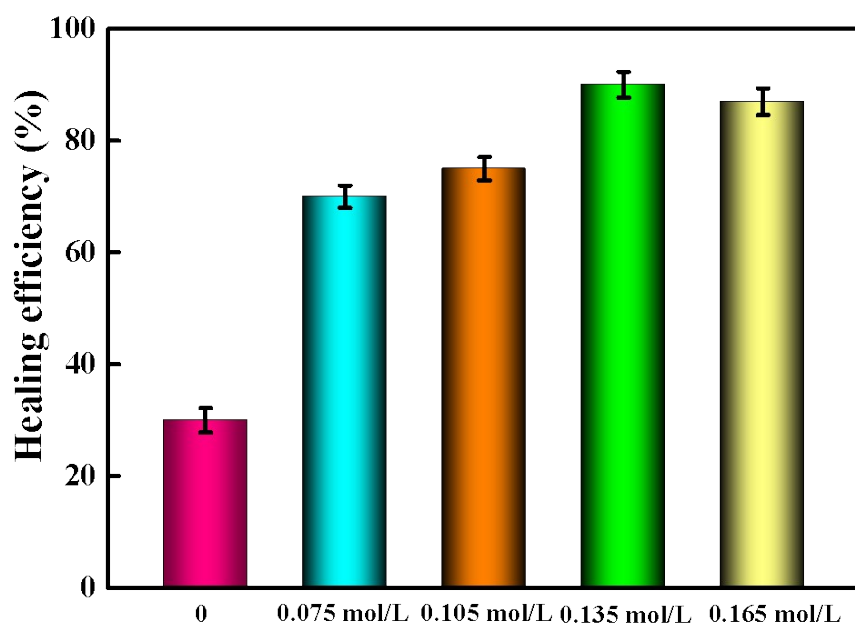

**Fig. S1.** Healing efficiency of the original and the self-healed hydrogels with different concentration of Al<sup>3+</sup>.

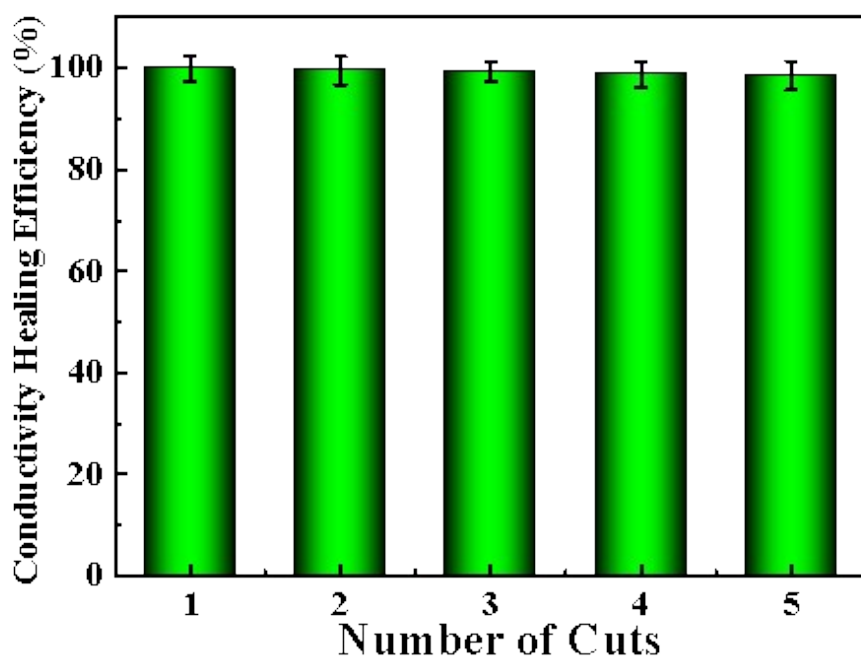

**Fig. S2.** The electrical healing efficiencies of the CTPA-0.135 hydrogel during five cutting-healing cycles.

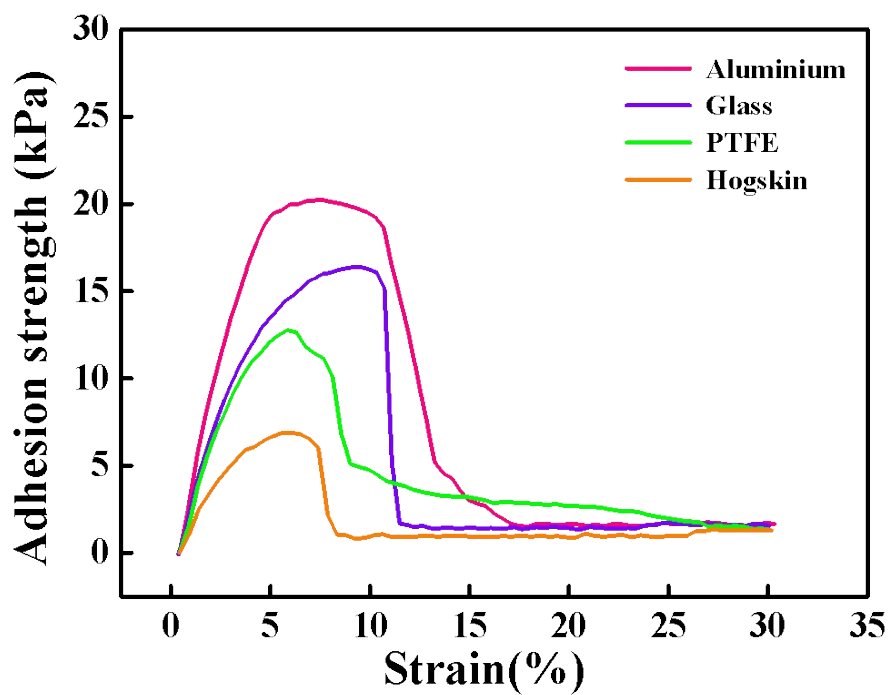

Fig. S3. Adhesive strength of the CTPA-0.135 hydrogels(CTA= 0.10 wt %) to aluminium, glass, PTFE and hogskin.

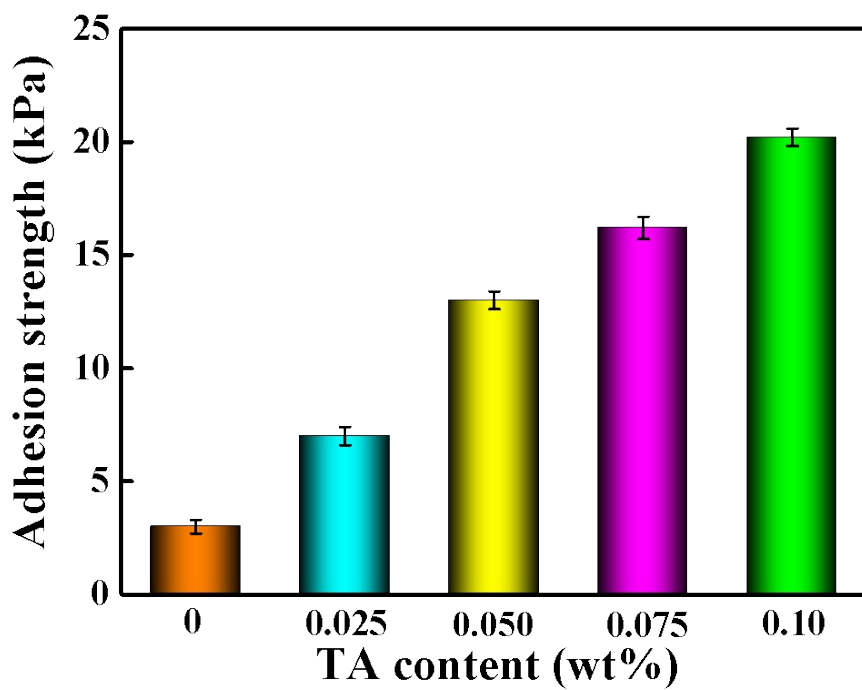

Fig. S4. The adhesion strength of the hydrogel with different concentration of TA to the aluminum substrate.

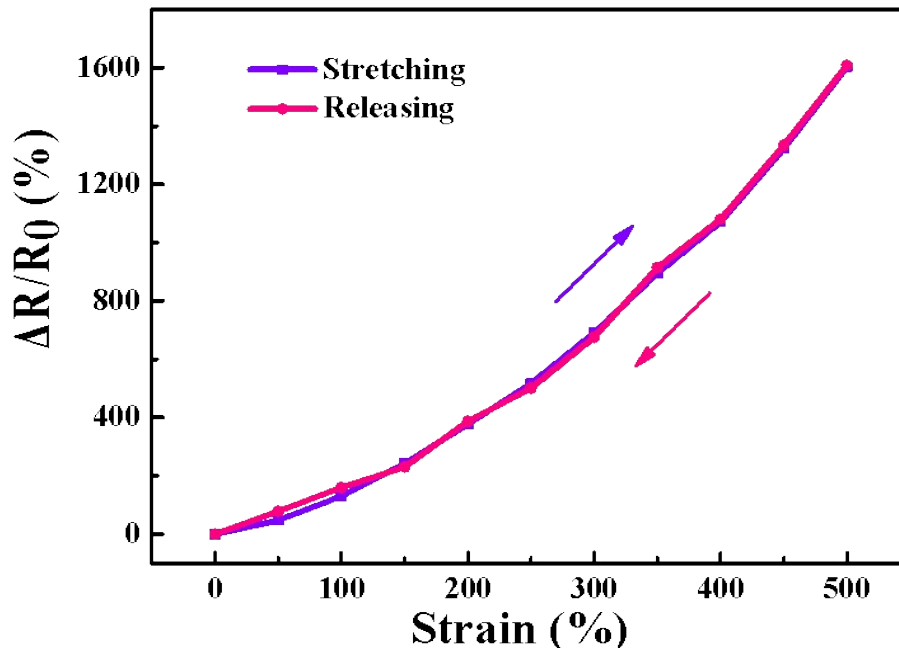

Fig. S5. Hysteresis of the CTPA hydrogel strain sensor.

Table S1. Comparison of the hydrogel strain sensors based on self-healing properties, self-adhesiveness, detection strain and gauge factor.

| Materials                        | Self-healing time | Self-healing efficiency | Adhesion strength | Detection strain | Gauge factor | Ref.        |
|----------------------------------|-------------------|-------------------------|-------------------|------------------|--------------|-------------|
| CS/PAA/TA@CNC/NaCl               | /                 | /                       | 19 KPa            | 0.5-300%         | 3.0          | [1]         |
| HTPB/IPDI/DBTDL/APDS             | 24 h              | 85%                     | /                 | /                | /            | [2]         |
| Gel/TA/Ag NW                     | /                 | 95%                     | /                 | /                | /            | [3]         |
| PDA/talc/PAM-KCl                 | 2 h               | /                       | 15.2 KPa          | 50-1000%         | 0.69         | [4]         |
| PVA/PSBMA                        | /                 | /                       | 7.2 KPa           | 300%             | 1.5          | [5]         |
| PAA/TA@CNCs/PANI                 | 24 h              | 90%                     | 440 N/m           | 545%             | 11.2         | [6]         |
| Ga/HbPAAmc/Dopa-Fe <sup>3+</sup> | 24 h              | 78%                     | 23 N/m            | 0-100%           | 2.814        | [7]         |
| P(SBMA-co-AAc)/CS-Cit            | 6 h 100°C         | 95.4%                   | 66.32 N/m         | 400%             | 2.93         | [8]         |
| PEG-Glay/PAMAA/Fe <sup>3+</sup>  | 12 h              | 97.1%                   | /                 | LED              | /            | [9]         |
| PDA/rGO/PAA/Fe <sup>3+</sup>     | 4 h               | 75%                     | /                 | 500%             | 1.32         | [10]        |
| <b>CS/TA/PAA/Al<sup>3+</sup></b> | <b>2 h</b>        | <b>90%</b>              | <b>20.21 KPa</b>  | <b>0.5-1400%</b> | <b>12.2</b>  | <b>Ours</b> |

Note: '/' means not mentioned.

#### REFERENCES

- [1] C. Cui, C. Shao, L. Meng and J. Yang, *ACS Appl. Mater. Inter.*, 2019, **11**, 39228-39237.
- [2] M. Khatib, O. Zohar, W. Saliba, S. Srebnik and H. Haick, *Adv. Funct. Mater.*, 2020, **30**, 1910196.
- [3] J. Wang, F. Tang, Y. Wang, Q. Lu, S. Liu and L. Li, *ACS Appl. Mater. Inter.*, 2020, **12**, 1558-1566.
- [4] X. Jing, H. Y. Mi, Y. J. Lin, E. Enriquez, X. F. Peng and L. S. Turng, *ACS Appl. Mater. Inter.*, 2018, **10**, 20897-20909.
- [5] Z. Wang, J. Chen, L. Wang, G. Gao, Y. Zhou, R. Wang, T. Xu, J. Yin and J. Fu, *J. Mater. Chem. B*, 2019, **7**, 24-29.
- [6] C. Y. Shao, L. Meng, C. Cui and J. Yang, *J. Mater. Chem. C*, 2019, **7**, 15208-15218.
- [7] Z. Gao, Y. Li, X. Shang, W. Hu, G. Gao and L. Duan, *Mater. Sci. Eng. C*, 2020, **106**, 110168.
- [8] J. Zhang, L. Chen, B. Shen, Y. Wang, P. Peng, F. Tang and J. Feng, *Mater. Sci. Eng. C*, 2020, **117**, 111298.
- [9] S. Liu, O. Oderinde, I. Hussain, F. Yao and G. Fu, *Polymer*, 2018, **144**, 111-120.
- [10] X. Jing, H. Y. Mi, X. F. Peng and L. S. Turng, *Carbon*, 2018, **136**, 63-72.

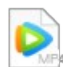

VID\_20200817\_100702.mp4

**Video S1.** The fast self-healing behavior of the CTPA-0.135 hydrogel(The healing time is about 12 seconds).
